# Supplementary material for: The Duration of Stress Determines Sex Specificities in the Vulnerability to Depression and in the Morphologic Remodeling of Neurons and Microglia
Source: PubMed Central journal article supplement (PMC8940280; doi:10.3389/fnbeh.2022.834821), 2022-03-07
Supplement: Image_1.pdf [file Image_1.pdf]

| Week 1    | Mon                   | Tue                               | Wed           | Thu           | Fri                      | Sat | Sun |
|-----------|-----------------------|-----------------------------------|---------------|---------------|--------------------------|-----|-----|
| 9h - 10h  | Confinement           | Cage replacement                  | Inacc. Food   | Overcrow ding | Cage replacement         |     |     |
| 10h - 11h |                       | Empty Bottle                      | Confinement   |               | Confinement              |     |     |
| 11h - 12h | Strobe Lights         | Startle Noise                     |               | Tilted Cage   |                          |     |     |
| 12h - 13h |                       |                                   | Tilted Cage   |               |                          |     |     |
| 13h - 14h |                       |                                   | Overcrow ding |               | Startle Noise            |     |     |
| 14h - 15h |                       |                                   |               |               |                          |     |     |
| 15h - 16h |                       |                                   |               |               |                          |     |     |
| 16h - 17h | Tilted Cage           | Overcrow ding                     | Strobe lights | Wet Bed       | Rev. Light + Tilted Cage |     |     |
| 17h - 18h |                       |                                   |               |               |                          |     |     |
| O/N       | Water Dep. + w et bed | Food deprivation+ ON Illumination |               |               |                          |     |     |

  

| Week 2    | Mon                  | Tue                                | Wed           | Thu          | Fri                      | Sat | Sun |
|-----------|----------------------|------------------------------------|---------------|--------------|--------------------------|-----|-----|
| 9h - 10h  | Confinement          | Cage replacement                   | Empty Bottle  | Cage Sw itch | Cage replacement         |     |     |
| 10h - 11h |                      | Inacc. Food                        | Overcrow ding |              | Confinement              |     |     |
| 11h - 12h | Startle Noise        | Tilted Cage                        |               | Confinement  |                          |     |     |
| 12h - 13h |                      |                                    | Overcrow ding |              |                          |     |     |
| 13h - 14h |                      |                                    | Overcrow ding |              | Strobe lights (LF)       |     |     |
| 14h - 15h |                      |                                    |               |              |                          |     |     |
| 15h - 16h |                      |                                    |               |              |                          |     |     |
| 16h - 17h | Food Dep. + w et bed | Water deprivation+ ON Illumination | Strobe lights | Wet Bed      | Inv. Light + Tilted Cage |     |     |
| 17h - 18h |                      |                                    |               |              |                          |     |     |
| O/N       |                      |                                    |               |              |                          |     |     |

  

| Week 3    | Mon                   | Tue                        | Wed           | Thu           | Fri                      | Sat | Sun |
|-----------|-----------------------|----------------------------|---------------|---------------|--------------------------|-----|-----|
| 9h - 10h  | Tilted Cage           | Cage replacemen            | Inacc. Food   | Overcrow ding | CageReplac.              |     |     |
| 10h - 11h |                       | Empty Bottle               | Confinement   |               | Cage Sw itch             |     |     |
| 11h - 12h | Strobe Lights         | Overcrow ding              |               | Tilted Cage   |                          |     |     |
| 12h - 13h |                       |                            |               |               |                          |     |     |
| 13h - 14h |                       |                            | Confinement   |               | Startle Noise            |     |     |
| 14h - 15h |                       |                            |               |               |                          |     |     |
| 15h - 16h |                       |                            |               |               |                          |     |     |
| 16h - 17h | Strobe Lights         | Overcrow ding              | Strobe Lights | Wet Bed       | Rev. Light + Tilted Cage |     |     |
| 17h - 18h |                       |                            |               |               |                          |     |     |
| O/N       | Water Dep. + w et bed | Food Dep.+O/N illumination | Strobe Lights |               |                          |     |     |

  

| Week 4    | Mon                  | Tue                      | Wed           | Thu          | Fri           | Sat | Sun |
|-----------|----------------------|--------------------------|---------------|--------------|---------------|-----|-----|
| 9h - 10h  | Confinement          | Cage replacemen          | Empty Bottle  | Cage Sw itch | CageReplac.   |     |     |
| 10h - 11h |                      | Inacc. Food              | Overcrow ding |              | Confinement   |     |     |
| 11h - 12h | Strobe Lights        | Tilted Cage              |               | Confinement  |               |     |     |
| 12h - 13h |                      |                          |               |              |               |     |     |
| 13h - 14h |                      |                          |               |              |               |     |     |
| 14h - 15h | Overcrow ding        | Strobe Lights            | Startle Noise | Tilted Cage  | Overcrow ding |     |     |
| 15h - 16h |                      |                          |               |              |               |     |     |
| 16h - 17h |                      |                          |               |              |               |     |     |
| 17h - 18h | Food Dep. + w et bed | w ater Dep. + O/N Illum. | Strobe Lights | Wet Bed      | Rev. Light    |     |     |
| O/N       |                      |                          |               |              |               |     |     |

  

| Week 5    | Mon                  | Tue                      | Wed           | Thu           | Fri                      | Sat | Sun |
|-----------|----------------------|--------------------------|---------------|---------------|--------------------------|-----|-----|
| 9h - 10h  | Cage Sw itch         | Cage replacemen          | Empty Bottle  | Overcrow ding | CageReplac.              |     |     |
| 10h - 11h |                      | Inacc. Food              | Strobe Lights |               | Confinement              |     |     |
| 11h - 12h | Strobe Lights        | Tilted cage              |               | Startle Noise |                          |     |     |
| 12h - 13h |                      |                          |               |               |                          |     |     |
| 13h - 14h |                      |                          |               |               |                          |     |     |
| 14h - 15h | Confinement          | Overcrow ding            | Confinement   | Cage Sw itch  | Strobe Lights            |     |     |
| 15h - 16h |                      |                          |               |               |                          |     |     |
| 16h - 17h |                      |                          |               |               |                          |     |     |
| 17h - 18h | Food Dep. + w et bed | w ater Dep. + O/N Illum. | Strobe lights | Wet Bed       | Rev. Light + Tilted Cage |     |     |
| O/N       |                      |                          |               |               |                          |     |     |

  

| Week 6    | Mon           | Tue            | Wed           | Thu           | Fri                      | Sat | Sun |
|-----------|---------------|----------------|---------------|---------------|--------------------------|-----|-----|
| 9h - 10h  | Tilted cage   | Inacc. Food    | Empty Bottle  | Overcrow ding | CageReplac.              |     |     |
| 10h - 11h |               | 1h Food Intake | Strobe Lights |               | Confinement              |     |     |
| 11h - 12h | Overcrow ding | Startle Noise  |               | Strobe Lights |                          |     |     |
| 12h - 13h |               |                |               |               |                          |     |     |
| 13h - 14h |               |                |               |               |                          |     |     |
| 14h - 15h | Strobe Lights | Tilted cage    | Confinement   | Cage Sw itch  | Strobe Lights            |     |     |
| 15h - 16h |               |                |               |               |                          |     |     |
| 16h - 17h |               |                |               |               |                          |     |     |
| 17h - 18h | Confinement   | Overcrow ding  | Strobe lights | Wet Bed       | Rev. Light + Tilted Cage |     |     |
| O/N       |               |                |               |               |                          |     |     |

**Supplementary Figure 1** – Schedule of unpredictable chronic mild stressors administered over a 7-day period and repeated for 2 or 6 weeks.

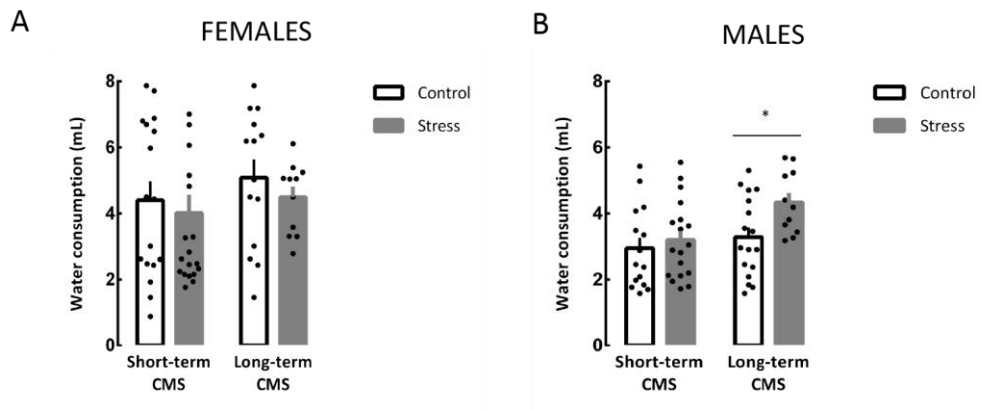

**Supplementary Figure 2** – Water consumption in Sucrose Preference Test (SPT) in females and males. Results are presented as the mean  $\pm$  SEM of 10-20 animals comparing with control, calculated using a two-way ANOVA followed by a Bonferroni post hoc test. \* $p < 0.05$ .

MICROGLIA

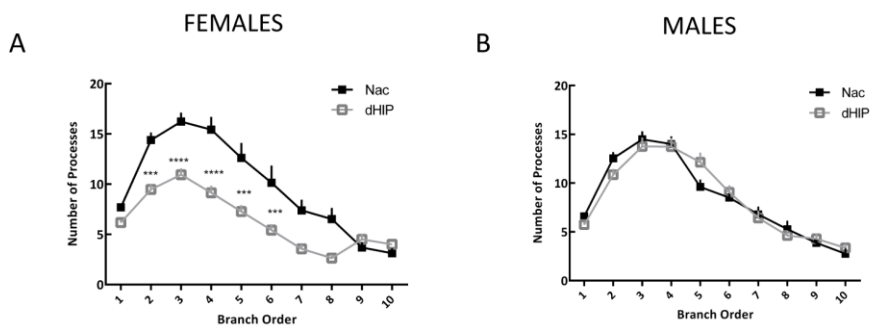

**Supplementary Figure 3 – Microglia morphology is more complex in the Nac than in the dHIP in females.** (A, B) Comparison of the number of microglial processes from dHIP and NAc of control animals according to the respective branch order in females and males. Results are presented as the mean  $\pm$  SEM of 30-40 cells from 3-4 animals, calculated using a one-way ANOVA followed by a Bonferroni post hoc test, \*\*\* $p < 0.05$ .
