# Supplementary material for: The Duration of Stress Determines Sex Specificities in the Vulnerability to Depression and in the Morphologic Remodeling of Neurons and Microglia
Source: PubMed Central journal article supplement (PMC8940280; doi:10.3389/fnbeh.2022.834821), 2022-03-07
Supplement: Table_1.pdf [file Table_1.pdf]

**Supplementary Table 1** – Female rats estrous cycle determined in the day of sacrificed.

|                    |         | <b>Proestrus</b> | <b>Estrus</b> | <b>Metestrus</b> | <b>Diestrus</b> |
|--------------------|---------|------------------|---------------|------------------|-----------------|
| <b>SHORT- TERM</b> | Control | 5                | 3             | 5                | 0               |
|                    | Stress  | 4                | 3             | 4                | 1               |
| <b>LONG-TERM</b>   | Control | 4                | 2             | 8                | 1               |
|                    | Stress  | 6                | 2             | 7                | 0               |
