# Supplementary material for: The Duration of Stress Determines Sex Specificities in the Vulnerability to Depression and in the Morphologic Remodeling of Neurons and Microglia
Source: PubMed Central journal article supplement (PMC8940280; doi:10.3389/fnbeh.2022.834821), 2022-03-07
Supplement: Table_2.pdf [file Table_2.pdf]

**Supplementary Table 2** - Morphometric data and statistics for microglia morphology from dHIP of females and males at PND exposed to short- and long-term uCMS: Number and length of ramifications

| MORPHOMETRIC DATA and STATISTICS |                         |                 |                        | dHIP – FEMALES      |
|----------------------------------|-------------------------|-----------------|------------------------|---------------------|
| NUMBER of PROCESSES              |                         |                 |                        |                     |
| ORDER                            | Control Short-term uCMS | Short-term uCMS | Control Long-term uCMS | Long-term uCMS      |
| 1                                | 6 ± 0.2 (n=40)          | 6 ± 0.3 (n=34)  | 6 ± 0.3 (n=40)         | 6 ± 0.3 (n=30)      |
| 2                                | 9 ± 0.4 (n=40)          | 10 ± 0.5 (n=34) | 10 ± 0.5 (n=40)        | 11 ± 0.5 (n=30)     |
| 3                                | 10 ± 0.5 (n=40)         | 10 ± 0.7 (n=34) | 11 ± 0.6 (n=40)        | 15 ± 0.8 (n=30) *** |
| 4                                | 8 ± 0.6 (n=40)          | 9 ± 1.0 (n=33)  | 9 ± 0.7 (n=40)         | 13 ± 0.9 (n=30)**** |
| 5                                | 7 ± 0.6 (n=32)          | 8 ± 1.1 (n=25)  | 7 ± 0.6 (n=26)         | 8 ± 1.0 (n=30)      |
| 6                                | 5 ± 0.5 (n=28)          | 6 ± 1.0 (n=17)  | 5 ± 0.6 (n=26)         | 7 ± 1.0 (n=25)      |
| 7                                | 4 ± 0.5 (n=19)          | 6 ± 1.0 (n=11)  | 4 ± 0.5 (n=16)         | 6 ± 1.0 (n=16)      |
| 8                                | 3 ± 0.4 (n=12)          | 4 ± 0.6 (n=9)   | 3 ± 0.3 (n=11)         | 4 ± 0.7 (n=11)      |
| 9                                | 5 ± 0.5 (n=4)           | 3 ± 0.9 (n=5)   | 5 ± 0.5 (n=4)          | 3 ± 0.5 (n=5)       |
| 10                               | 4 ± 0.0 (n=1)           | 3 ± 0.7 (n=3)   | 4 ± 0.0 (n=1)          | 3 ± 1.0 (n=2)       |

| MORPHOMETRIC DATA and STATISTICS |                         |                 |                        | dHIP – MALES    |
|----------------------------------|-------------------------|-----------------|------------------------|-----------------|
| NUMBER of PROCESSES              |                         |                 |                        |                 |
| ORDER                            | Control Short-term uCMS | Short-term uCMS | Control Long-term uCMS | Long-term uCMS  |
| 1                                | 6 ± 0.3 (n=25)          | 6 ± 0.4 (n=30)  | 6 ± 0.3 (n=34)         | 6 ± 0.4 (n=30)  |
| 2                                | 11 ± 0.6 (n=25)         | 11 ± 0.6 (n=30) | 11 ± 0.6 (n=34)        | 12 ± 0.7 (n=30) |
| 3                                | 14 ± 0.9 (n=25)         | 13 ± 0.7 (n=30) | 14 ± 0.9 (n=34)        | 14 ± 1.1 (n=30) |
| 4                                | 15 ± 1.0 (n=25)         | 14 ± 0.8 (n=30) | 14 ± 0.9 (n=34)        | 13 ± 1.1 (n=29) |
| 5                                | 13 ± 1.2 (n=25)         | 12 ± 1.0 (n=30) | 12 ± 1.0 (n=34)        | 10 ± 1.0 (n=29) |
| 6                                | 9 ± 0.8 (n=24)          | 10 ± 0.9 (n=27) | 9 ± 0.7 (n=33)         | 9 ± 1.2 (n=20)  |
| 7                                | 6 ± 0.8 (n=23)          | 6 ± 0.7 (n=25)  | 6 ± 0.8 (n=31)         | 6 ± 1.1 (n=19)  |
| 8                                | 5 ± 0.5 (n=21)          | 4 ± 0.6 (n=17)  | 5 ± 0.5 (n=27)         | 4 ± 0.7 (n=14)  |
| 9                                | 4 ± 0.5 (n=13)          | 5 ± 0.8 (n=7)   | 4 ± 0.5 (n=17)         | 4 ± 0.9 (n=7)   |
| 10                               | 3 ± 0.5 (n=9)           | 3 ± 0.9 (n=5)   | 3 ± 0.4 (n=11)         | 4 ± 0.3 (n=4)   |
