# Supplementary material for: The Duration of Stress Determines Sex Specificities in the Vulnerability to Depression and in the Morphologic Remodeling of Neurons and Microglia
Source: PubMed Central journal article supplement (PMC8940280; doi:10.3389/fnbeh.2022.834821), 2022-03-07
Supplement: Table_3.pdf [file Table_3.pdf]

**Supplementary Table 3** - Morphometric data and statistics for microglia morphology from NAc of females and males at PND exposed to short- and long-term uCMS: Number and length of ramifications

| MORPHOMETRIC DATA and STATISTICS |                        |                    |                       | NAC- FEMALES      |
|----------------------------------|------------------------|--------------------|-----------------------|-------------------|
| NUMBER of PROCESSES              |                        |                    |                       |                   |
| ORDER                            | Control Short-term CMS | Short-term CMS     | Control Long-term CMS | Long-term CMS     |
| 1                                | 6 ± 0.4 (n=30)         | 7 ± 0.4 (n=30)     | 6 ± 0.4 (n=40)        | 6 ± 0.4 (n=30)    |
| 2                                | 12 ± 0.8 (n=30)        | 10 ± 0.7 (n=30)    | 12 ± 0.7 (n=40)       | 12 ± 0.8 (n=30)   |
| 3                                | 15 ± 1.0 (n=30)        | 11 ± 0.7 (n=30)*   | 15 ± 0.9 (n=40)       | 14 ± 1.0 (n=30)   |
| 4                                | 15 ± 1.4 (n=30)        | 9 ± 0.8 (n=30)***  | 15 ± 1.1 (n=40)       | 13 ± 1.1 (n=30)   |
| 5                                | 14 ± 1.8 (n=28)        | 8 ± 0.8 (n=27)***  | 13 ± 1.4 (n=38)       | 9 ± 0.8 (n=30)    |
| 6                                | 14 ± 2.1 (n=25)        | 6 ± 0.8 (n=20)**** | 12 ± 1.7 (n=34)       | 6 ± 0.8 (n=29) *  |
| 7                                | 11 ± 1.6 (n=22)        | 4 ± 0.9 (n=14)**   | 9 ± 1.3 (n=30)        | 5 ± 0.7 (n=24)*** |
| 8                                | 10 ± 1.5 (n=18)        | 4 ± 0.7 (n=9)      | 8 ± 1.3 (n=24)        | 4 ± 0.7 (n=15) *  |
| 9                                | 6 ± 0.9 (n=16)         | 2 ± 0.3 (n=6)      | 6 ± 0.9 (n=18)        | 4 ± 1.1 (n=7)     |
| 10                               | 6 ± 0.9 (n=11)         | 2 ± 0.0 (n=1)      | 6 ± 0.8 (n=12)        | 5 ± 2.7 (n=3)     |

| MORPHOMETRIC DATA and STATISTICS |                        |                     |                       | NAC- MALES      |
|----------------------------------|------------------------|---------------------|-----------------------|-----------------|
| NUMBER of PROCESSES              |                        |                     |                       |                 |
| ORDER                            | Control Short-term CMS | Short-term CMS      | Control Long-term CMS | Long-term CMS   |
| 1                                | 6 ± 0.5 (n=29)         | 7 ± 0.5 (n=30)      | 7 ± 0.4 (n=39)        | 7 ± 0.4 (n=29)  |
| 2                                | 12 ± 0.7 (n=29)        | 13 ± 0.8 (n=30)     | 13 ± 0.6 (n=39)       | 13 ± 0.8 (n=29) |
| 3                                | 14 ± 1.0 (n=29)        | 18 ± 0.9 (n=30)*    | 14 ± 0.8 (n=39)       | 14 ± 1.0 (n=29) |
| 4                                | 14 ± 0.9 (n=29)        | 19 ± 1.0 (n=30)***  | 14 ± 0.8 (n=39)       | 11 ± 1.1 (n=29) |
| 5                                | 10 ± 0.9 (n=29)        | 15 ± 1.0 (n=30)**** | 10 ± 0.8 (n=39)       | 8 ± 0.9 (n=29)  |
| 6                                | 8 ± 1.1 (n=27)         | 13 ± 1.1 (n=29)**   | 9 ± 0.9 (n=36)        | 6 ± 0.9 (n=28)  |
| 7                                | 8 ± 1.0 (n=24)         | 8 ± 0.9 (n=25)      | 7 ± 0.8 (n=33)        | 6 ± 1.3 (n=16)  |
| 8                                | 5 ± 0.9 (n=19)         | 4 ± 0.7 (n=21)      | 5 ± 0.9 (n=22)        | 4 ± 0.6 (n=11)  |
| 9                                | 4 ± 0.7 (n=13)         | 4 ± 0.6 (n=13)      | 4 ± 0.7 (n=15)        | 2 ± 0.0 (n=5)   |
| 10                               | 3 ± 0.6 (n=8)          | 3 ± 0.7 (n=8)       | 3 ± 0.6 (n=8)         | 2 ± 0.0 (n=2)   |
