# Supplementary material for: The Duration of Stress Determines Sex Specificities in the Vulnerability to Depression and in the Morphologic Remodeling of Neurons and Microglia
Source: PubMed Central journal article supplement (PMC8940280; doi:10.3389/fnbeh.2022.834821), 2022-03-07
Supplement: Table_4.pdf [file Table_4.pdf]

**Supplementary Table 4** - Morphometric data and statistics for microglia morphology from dHIP and NAc of females and males at PND 90 in physiological conditions: Number and length of ramifications

| MORPHOMETRIC DATA and STATISTICS |                 |                      |
|----------------------------------|-----------------|----------------------|
| FEMALES                          |                 |                      |
| NUMBER of PROCESSES              |                 |                      |
| ORDER                            | dHIP            | NAc                  |
| 1                                | 6 ± 0.2 (n=40)  | 6 ± 0.4 (n=30)       |
| 2                                | 9 ± 0.4 (n=40)  | 12 ± 0.8 (n=30)      |
| 3                                | 10 ± 0.5 (n=40) | 15 ± 1.0 (n=30) **** |
| 4                                | 8 ± 0.6 (n=40)  | 15 ± 1.4 (n=30) **** |
| 5                                | 7 ± 0.6 (n=32)  | 14 ± 1.8 (n=28) **** |
| 6                                | 5 ± 0.5 (n=28)  | 14 ± 2.1 (n=25) ***  |
| 7                                | 4 ± 0.5 (n=19)  | 11 ± 1.6 (n=22)      |
| 8                                | 3 ± 0.4 (n=12)  | 10 ± 1.5 (n=18)      |
| 9                                | 5 ± 0.5 (n=4)   | 6 ± 0.9 (n=16)       |
| 10                               | 4 ± 0.0 (n=1)   | 6 ± 0.9 (n=11)       |

| MORPHOMETRIC DATA and STATISTICS |                 |                 |
|----------------------------------|-----------------|-----------------|
| MALES                            |                 |                 |
| NUMBER of PROCESSES              |                 |                 |
| ORDER                            | dHIP            | NAc             |
| 1                                | 6 ± 0.3 (n=25)  | 6 ± 0.5 (n=29)  |
| 2                                | 11 ± 0.6 (n=25) | 12 ± 0.7 (n=29) |
| 3                                | 14 ± 0.9 (n=25) | 14 ± 1.0 (n=29) |
| 4                                | 15 ± 1.0 (n=25) | 14 ± 0.9 (n=29) |
| 5                                | 13 ± 1.2 (n=25) | 10 ± 0.9 (n=29) |
| 6                                | 9 ± 0.8 (n=24)  | 8 ± 1.1 (n=27)  |
| 7                                | 6 ± 0.8 (n=23)  | 8 ± 1.0 (n=24)  |
| 8                                | 5 ± 0.5 (n=21)  | 5 ± 0.9 (n=19)  |
| 9                                | 4 ± 0.5 (n=13)  | 4 ± 0.7 (n=13)  |
| 10                               | 3 ± 0.5 (n=9)   | 3 ± 0.6 (n=8)   |
