# Supplementary material for: The Duration of Stress Determines Sex Specificities in the Vulnerability to Depression and in the Morphologic Remodeling of Neurons and Microglia
Source: PubMed Central journal article supplement (PMC8940280; doi:10.3389/fnbeh.2022.834821), 2022-03-07
Supplement: Table_5.pdf [file Table_5.pdf]

**Supplementary Table 5 – Number of animals in each behavioral test.**

|                           | FEMALES            |                         |                      | MALES              |                         |                      |
|---------------------------|--------------------|-------------------------|----------------------|--------------------|-------------------------|----------------------|
|                           | Elevated Plus Maze | Sucrose Preference Test | Forced Swimming Test | Elevated Plus Maze | Sucrose Preference Test | Forced Swimming Test |
| Control (short-term uCMS) | 14                 | 17                      | 17                   | 11                 | 15                      | 17                   |
| Short-term uCMS           | 20                 | 20                      | 20                   | 16                 | 19                      | 20                   |
| Control (long-term uCMS)  | 14                 | 14                      | 11                   | 17                 | 14                      | 17                   |
| Long-term uCMS            | 10                 | 11                      | 11                   | 10                 | 11                      | 11                   |
